# Supplementary material
Source: PubMed Central journal article supplement (PMC8224532)
Supplement: NIHMS1686875-supplement-Sup1.pdf [file NIHMS1686875-supplement-Sup1.pdf]

**Supporting Information**

**Censoring trace-level environmental data: statistical analysis considerations to limit bias**

Barbara Jane George<sup>1\*</sup>, Leslie Gains-Germain<sup>2</sup>, Kristin Broms<sup>2</sup>, Kelly Black<sup>2</sup>, Marschall Furman<sup>3</sup>, Michael D. Hays<sup>4</sup>, Kent W. Thomas<sup>1</sup>, Jane Ellen Simmons<sup>1</sup>

<sup>1</sup> Center for Public Health and Environmental Assessment, Office of Research and Development, U.S. EPA, Research Triangle Park, North Carolina 27711, United States

<sup>2</sup> Neptune and Company, Inc., Lakewood, Colorado 80215, United States

<sup>3</sup> Oak Ridge Institute for Science and Education (ORISE) Research Participant at U.S. EPA, Office of Research and Development, Center for Public Health and Environmental Assessment, Research Triangle Park, North Carolina 27711, United States

<sup>4</sup> Center for Environmental Measurement and Modeling, Office of Research and Development, U.S. EPA, Research Triangle Park, North Carolina 27711, United States

\*Address correspondence to B.J. George, CPHEA/ORD/U.S. EPA, 109 T.W. Alexander Dr., Research Triangle Park, NC 27711 USA. Telephone: (919) 541-4551. E-mail: [george.bj@epa.gov](mailto:george.bj@epa.gov)

**Table of Contents**

|                                                                  |                  |
|------------------------------------------------------------------|------------------|
| <b>SW-846 Method Detection Limit, Revision 1, July 1992.....</b> | <b>S2</b>        |
| <b>Example S1.....</b>                                           | <b>S3</b>        |
| <b>Tables S1-S18.....</b>                                        | <b>S5 – S29</b>  |
| <b>Figures S1-S13.....</b>                                       | <b>S30 – S42</b> |

## SW-846 Method Detection Limit, Revision 1, July 1992

This MDL definition that was applied in the original cook-stove study was not cited by Shen et al. 2016 and is provided here because we recommend, as stated in the concluding sentence of the paper, "report and publish: all measurement data without censoring along with data quality indicators, detection limits, reporting levels and other censoring thresholds, and the methods used in calculating these, without regard to the use of censoring in both primary and secondary analyses."

### METHOD DETECTION LIMIT (MDL):

The minimum concentration of a substance that can be measured and reported with 99% confidence that the analyte concentration is greater than zero and is determined from analysis of a sample in a given matrix type containing the analyte.

For operational purposes, when it is necessary to determine the MDL in the matrix, the MDL should be determined by multiplying the appropriate one-sided 99% t-statistic by the standard deviation obtained from a minimum of three analyses of a matrix spike containing the analyte of interest at a concentration three to five times the estimated MDL, where the t-statistic is obtained from standard references or the table below.

| <u>No. of samples:</u> | <u>t-statistic</u> |
|------------------------|--------------------|
| 3                      | 6.96               |
| 4                      | 4.54               |
| 5                      | 3.75               |
| 6                      | 3.36               |
| 7                      | 3.14               |
| 8                      | 3.00               |
| 9                      | 2.90               |
| 10                     | 2.82               |

Estimate the MDL as follows:

Obtain the concentration value that corresponds to:

- an instrument signal/noise ratio within the range of 2.5 to 5.0, or
- the region of the standard curve where there is a significant change in sensitivity (i.e., a break in the slope of the standard curve).

CD-ROM

ONE - 26

Revision 1  
July 1992

Determine the variance ( $S^2$ ) for each analyte as follows:

$$s^2 = \frac{1}{n-1} \left[ \sum_{i=1}^n (x_i - \bar{x})^2 \right]$$

where  $x_i$  = the  $i$ th measurement of the variable  $x$   
and  $\bar{x}$  = the average value of  $x$ ;

$$\bar{x} = \frac{1}{n} \sum_{i=1}^n x_i$$

Determine the standard deviation ( $s$ ) for each analyte as follows:

$$s = (S^2)^{1/2}$$

Determine the MDL for each analyte as follows:

$$\text{MDL} = t_{(n-1, \alpha = .99)}(s)$$

where  $t_{(n-1, \alpha = .99)}$  is the one-sided t-statistic appropriate for the number of samples used to determine ( $s$ ), at the 99 percent level.

Example S1. Use of R *EnvStats::elnormAltCensored()* for Maximum Likelihood Estimation (MLE) and R *EnvStats::enparCensored()* for Kaplan Meier estimation of the mean and SD of 10 data observations where 1 observation has been censored.

Step 1. Randomly generate 10 lognormal(zeta, sigma) observations using SAS data step code adapted from <https://blogs.sas.com/content/iml/2017/05/10/simulate-lognormal-data-sas.html>

```
%let N = 10;      /* sample size */
data LN10;
call streaminit(98765);
sigma = 0.5;     /* shape or log-scale parameter */
zeta = 2;        /* scale or log-location parameter */
do i = 1 to &N;
  Y = rand("Normal", zeta, sigma); /* Y ~ N(zeta, sigma) */
  X = exp(Y);      /* X ~ LogN(zeta, sigma) */
  output;
end;
keep X;
run;
```

Step 2. After censoring the smallest observation (or if starting with previously censored data), prepare the data for the R *EnvStats* functions *enparCensored()* and *elnormAltCensored()*. Here the data generated in Step 1 are in the “orig.X” column. These data are stored in a file named “data10, 1 obs censored.csv.”

| orig.X  | X       | censored |
|---------|---------|----------|
| <5      | 5       | TRUE     |
| 5.5852  | 5.5852  | FALSE    |
| 6.2982  | 6.2982  | FALSE    |
| 6.7822  | 6.7822  | FALSE    |
| 7.4194  | 7.4194  | FALSE    |
| 7.4619  | 7.4619  | FALSE    |
| 8.9753  | 8.9753  | FALSE    |
| 9.7251  | 9.7251  | FALSE    |
| 10.1279 | 10.1279 | FALSE    |
| 14.6743 | 14.6743 | FALSE    |

Step 3. Execute R code

```
setwd("C:\\MLE & KM example\\") #update the path information before execution
getwd()

library(EnvStats) #R package EnvStats must be installed prior to execution

data <- read.csv("data10, 1 obs censored.csv") #update the data's CSV filename, as warranted
summary(data)
```

```

X <- data$X
X

censored <- data$censored
censored

elnormAltCensored(X,censored,method="mle")
# in line above, replace "mle" with "rROS" for Robust Regression on Order Statistics estimation

enparCensored(X,censored)

```

Step 4. Maximum Likelihood Estimation output from Step 3.

```

Results of Distribution Parameter Estimation
Based on Type I Censored Data
-----
Assumed Distribution:          Lognormal
Censoring Side:              left
Censoring Level(s):         5
Estimated Parameter(s):     mean = 8.1337926
                             cv   = 0.3399739
Estimation Method:          MLE
Data:                        X
Censoring Variable:         censored
Sample Size:                10
Percent Censored:           10%

```

Noting that  $cv = SD/mean$ ,  $SD = mean*cv = 2.765$

Step 5. Kaplan Meier output from Step 3.

```

Results of Distribution Parameter Estimation
Based on Type I Censored Data
-----
Assumed Distribution:          None
Censoring Side:              left
Censoring Level(s):         5
Estimated Parameter(s):      mean    = 8.2049500
                             sd       = 2.6910675
                             se.mean  = 0.8509903

Estimation Method:          Kaplan-Meier
Data:                       X
Censoring Variable:         censored
Sample Size:                10
Percent Censored:           10%
  
```

Step 6. Here are the true sample mean and SD from the SAS MEANS procedure. Note the censored data value was 3.8816.

```

Analysis Variable : X
  N      Mean      Std Dev
  10    8.093112   2.994668
  
```

Step 7. Calculate Bias: compare MLE and Kaplan Meier estimates to the mean and SD from the full, uncensored data. Note that censoring removed information that is not truly reconstituted by statistical analysis.

Bias is the estimated value minus the true value

| Approach                        | Descriptive Statistics |                    | Bias<br>(Estimated - True value) |        |
|---------------------------------|------------------------|--------------------|----------------------------------|--------|
|                                 | Mean                   | SD                 | Mean                             | SD     |
| Full sample (n=10 observations) | 8.093 <sup>a</sup>     | 2.995 <sup>a</sup> |                                  |        |
| After censoring 1 observation   |                        |                    |                                  |        |
| Maximum Likelihood Estimation   | 8.134 <sup>b</sup>     | 2.765 <sup>b</sup> | 0.041                            | -0.230 |
| Kaplan-Meier                    | 8.205 <sup>b</sup>     | 2.691 <sup>b</sup> | 0.112                            | -0.304 |

<sup>a</sup>True value

<sup>b</sup>Estimated value

Table S1. Method detection limit (MDL) and calibration curve lowest value (CCLV) with sample sizes<sup>a</sup> by category for each PAH considered for the case study

| PAH                     | PAH<br>Abbreviation | MDL<br>(ng/μL) | CCLV<br>(ng/μL) | n<br>< MDL | n between<br>MDL & CCLV | n<br>≥ CCLV |
|-------------------------|---------------------|----------------|-----------------|------------|-------------------------|-------------|
| Benzo(a)pyrene          | BaP                 | 0.010          | 0.05            |            | 8                       | 44          |
| Benzo(b)fluoranthene    | BbF                 | 0.016          | 0.10            | 2          | 6                       | 44          |
| Benzo(e)pyrene          | BeP                 | 0.010          | 0.05            |            | 8                       | 44          |
| Benzo(g,h,i)pyrene      | BghiP               | 0.019          | 0.05            | 1          | 3                       | 46          |
| Benzo(k)fluoranthene    | BkF                 | 0.011          | 0.05            | 2          | 4                       | 46          |
| Coronene                | COR                 | 0.025          | 0.05            |            | 5                       | 47          |
| Dibenzo[a,h]anthracene  | DBA                 | 0.023          | 0.10            | 8          | 18                      | 21          |
| Indeno[1,2,3-c,d]pyrene | IcdP                | 0.040          | 0.05            | 7          |                         | 44          |
| Perylene                | PER                 | 0.011          | 0.05            | 1          | 4                       | 41          |

<sup>a</sup>Sample size counts omit blanks and samples for which measurement values could not be recorded (i.e., signal-to-noise ratio <=1)

Table S2.GC-MS dibenzo(a,h)anthracene (DBA) data used in the case study (n=47) and corresponding method detection limit (MDL) and calibration curve lowest value (CCLV)

| DBA<br>(ng/μL) | MDL<br>(ng/μL) | CCLV<br>(ng/μL) | Detection<br>Flag |
|----------------|----------------|-----------------|-------------------|
| 0.01           | 0.023          | 0.10            | < MDL             |
| 0.01           | 0.023          | 0.10            | < MDL             |
| 0.01           | 0.023          | 0.10            | < MDL             |
| 0.01           | 0.023          | 0.10            | < MDL             |
| 0.01           | 0.023          | 0.10            | < MDL             |
| 0.01           | 0.023          | 0.10            | < MDL             |
| 0.02           | 0.023          | 0.10            | < MDL             |
| 0.02           | 0.023          | 0.10            | < MDL             |
| 0.03           | 0.023          | 0.10            | < CCLV            |
| 0.03           | 0.023          | 0.10            | < CCLV            |
| 0.04           | 0.023          | 0.10            | < CCLV            |
| 0.04           | 0.023          | 0.10            | < CCLV            |
| 0.04           | 0.023          | 0.10            | < CCLV            |
| 0.04           | 0.023          | 0.10            | < CCLV            |
| 0.05           | 0.023          | 0.10            | < CCLV            |
| 0.05           | 0.023          | 0.10            | < CCLV            |
| 0.05           | 0.023          | 0.10            | < CCLV            |
| 0.06           | 0.023          | 0.10            | < CCLV            |
| 0.07           | 0.023          | 0.10            | < CCLV            |
| 0.07           | 0.023          | 0.10            | < CCLV            |
| 0.07           | 0.023          | 0.10            | < CCLV            |
| 0.07           | 0.023          | 0.10            | < CCLV            |
| 0.07           | 0.023          | 0.10            | < CCLV            |
| 0.08           | 0.023          | 0.10            | < CCLV            |
| 0.08           | 0.023          | 0.10            | < CCLV            |
| 0.10           | 0.023          | 0.10            | Detect            |
| 0.11           | 0.023          | 0.10            | Detect            |
| 0.12           | 0.023          | 0.10            | Detect            |
| 0.12           | 0.023          | 0.10            | Detect            |
| 0.15           | 0.023          | 0.10            | Detect            |
| 0.15           | 0.023          | 0.10            | Detect            |
| 0.19           | 0.023          | 0.10            | Detect            |
| 0.32           | 0.023          | 0.10            | Detect            |
| 0.40           | 0.023          | 0.10            | Detect            |
| 0.52           | 0.023          | 0.10            | Detect            |
| 0.60           | 0.023          | 0.10            | Detect            |
| 0.75           | 0.023          | 0.10            | Detect            |

|      |       |      |        |
|------|-------|------|--------|
| 0.87 | 0.023 | 0.10 | Detect |
| 0.89 | 0.023 | 0.10 | Detect |
| 1.00 | 0.023 | 0.10 | Detect |
| 1.12 | 0.023 | 0.10 | Detect |
| 1.16 | 0.023 | 0.10 | Detect |
| 1.31 | 0.023 | 0.10 | Detect |
| 1.31 | 0.023 | 0.10 | Detect |
| 1.46 | 0.023 | 0.10 | Detect |
| 2.94 | 0.023 | 0.10 | Detect |

---



Table S3. R syntax used to estimate mean and standard deviation for approaches used in the case study

| Approach                                               | R Syntax                                                                | Supports<br>Single/Multiple<br>Censoring |
|--------------------------------------------------------|-------------------------------------------------------------------------|------------------------------------------|
| Uncensored                                             |                                                                         |                                          |
| Full sample                                            | mean(), sd()                                                            | Both                                     |
| Full sample Maximum Likelihood Estimation <sup>a</sup> | elnormAlt( ,method="mle")\$parameters <sup>b</sup>                      | Both                                     |
| After censoring                                        |                                                                         |                                          |
| Substitute MDL/2                                       | mean(), sd() <sup>c</sup>                                               | Both                                     |
| Maximum Likelihood Estimation <sup>a</sup>             | elnormAltCensored(<br>,censored,method="mle")\$parameters <sup>d</sup>  | Both                                     |
| Robust Regression on Order Statistics <sup>a</sup>     | elnormAltCensored(<br>,censored,method="rROS")\$parameters <sup>e</sup> | Both                                     |
| Kaplan-Meier <sup>a</sup>                              | enparCensored() <sup>f</sup>                                            | Both                                     |
| After omitting observations                            |                                                                         |                                          |
| Complete case                                          | mean(), sd()                                                            | Both                                     |

<sup>a</sup>*EnvStats* package <https://cran.r-project.org/web/packages/EnvStats/EnvStats.pdf>. This *EnvStats* documentation describes function options, including which of its methods support only singly censored data and which support multiply censored data.

<sup>b</sup>*elnormAlt()* assumes a lognormal distribution and uses maximum likelihood estimation for the mean and coefficient of variation. The standard deviation is estimated by the product of this mean and coefficient of variation. Maximum likelihood estimation is a parametric method based on maximizing the likelihood function.

<sup>c</sup>*sd()* function is based on variance estimated using n-1 as the divisor

<sup>d</sup>*elnormAltCensored(method="mle")* assumes a lognormal distribution and uses maximum likelihood estimation to estimate the mean and coefficient of variation in the presence of censored data. The standard deviation is estimated by the product of the mean and coefficient of variation. Maximum likelihood estimation is a parametric method based on maximizing the likelihood function. Similarly, use *egammaAltCensored()* for censored data when assuming a gamma distribution.

<sup>e</sup>*elnormAltCensored(method="rROS")* robust regression on order statistics is considered semiparametric because values are imputed parametrically for the censored data and combined with (observed) detected values, which are not parametric, to complete the distribution. The imputed values are predicted by fitting parametric quantile-quantile regression on the log-transformed data, back-transforming their values to original scale, and estimating the mean and standard deviation using method of moments. For more information, see *EnvStats* documentation

for the `elnormAltCensored()` function <https://cran.r-project.org/web/packages/EnvStats/EnvStats.pdf> and page 15-15 in US EPA (2009) Statistical Analysis of Groundwater Monitoring Data at RCRA Facilities, Unified Guidance, EPA-530-R-09-007, Office of Resource Conservation and Recovery Program Implementation and Information Division, U.S. Environmental Protection Agency, Washington, <https://archive.epa.gov/epawaste/hazard/web/html/index-12.html>, accessed July 19, 2020.

`enparCensored()` Kaplan-Meier estimator is nonparametric because it uses the observed data's empirical cumulative distribution function (ECDF) directly (rather than fitting a parametric distribution). The fitted ECDF is used to estimate the population mean and standard deviation adjusted for data censoring. The `enparCensored()` default settings, used here, include `censoring.side="left"` and the generalized product-limit probability method for plotting positions due to Michael and Schucany (1986) for estimating the ECDF. Several probability methods for calculating the plotting positions (empirical probabilities) are available and include Michael and Schucany (1986) generalized product-limit (the default), Gillespie et al. (2010) reverse Kaplan Meier, and Hirsch and Stedinger (1987) generalized product-limit. For more information, see *EnvStats* documentation for the `enparCensored()` and `ecdfPlotCensored()` functions <https://cran.r-project.org/web/packages/EnvStats/EnvStats.pdf> and page 15-7 in US EPA (2009) Statistical Analysis of Groundwater Monitoring Data at RCRA Facilities, Unified Guidance, EPA-530-R-09-007, Office of Resource Conservation and Recovery Program Implementation and Information Division, U.S. Environmental Protection Agency, Washington, <https://archive.epa.gov/epawaste/hazard/web/html/index-12.html>, accessed July 19, 2020. Also see:

- Michael, J.R., and W.R. Schucany (1986). Analysis of Data from Censored Samples, In D'Agostino, R.B., and M.A. Stephens, eds. *Goodness-of Fit Techniques*. Marcel Dekker, New York, 560pp, Chapter 11, 461-496.
- Gillespie, B.W., Q. Chen, H. Reichert, A. Franzblau, E. Hedgeman, J. Lepkowski, P. Adriaens, A. Demond, W. Luksemburg, and D.H. Garabrant. (2010). Estimating Population Distributions When Some Data Are Below a Limit of Detection by Using a Reverse Kaplan-Meier Estimator. *Epidemiology* 21(4), S64-S70.
- Hirsch, R.M., and J.R. Stedinger. (1987). Plotting Positions for Historical Floods and Their Precision. *Water Resources Research* 23(4), 715-727.

Table S4. GC-MS dibenzo(a,h)anthracene (DBA) data used in the group comparisons: counts before resampling (n=24), corresponding method detection limit (MDL), calibration curve lowest value (CCLV), and counts after resampling for each distinct DBA value (n=85)

| Stove Type                           | Stove                                  | DBA<br>(ng/μL) | MDL<br>(ng/μL) | CCLV<br>(ng/μL) | Resampled<br>Counts |
|--------------------------------------|----------------------------------------|----------------|----------------|-----------------|---------------------|
| Stove Type 2 (n=40 after resampling) | Butterfly Model<br>(n=9)               | 0.01           | 0.023          | 0.10            | 8                   |
|                                      |                                        | 0.02           | 0.023          | 0.10            | 3                   |
|                                      |                                        | 0.06           | 0.023          | 0.10            | 4                   |
|                                      |                                        | 0.07           | 0.023          | 0.10            | 7                   |
|                                      |                                        | 0.08           | 0.023          | 0.10            | 4                   |
|                                      |                                        | 0.10           | 0.023          | 0.10            | 2                   |
|                                      |                                        | 0.11           | 0.023          | 0.10            | 4                   |
|                                      |                                        | 0.12           | 0.023          | 0.10            | 3                   |
|                                      |                                        | 0.19           | 0.023          | 0.10            | 5                   |
| Stove Type 1 (n=45 after resampling) | Eco Chula XXL<br>(n=15)                | 0.01           | 0.023          | 0.10            | 5                   |
|                                      |                                        | 0.01           | 0.023          | 0.10            |                     |
|                                      |                                        | 0.03           | 0.023          | 0.10            | 2                   |
|                                      |                                        | 0.04           | 0.023          | 0.10            | 9                   |
|                                      |                                        | 0.04           | 0.023          | 0.10            |                     |
|                                      |                                        | 0.05           | 0.023          | 0.10            | 2                   |
|                                      |                                        | 0.07           | 0.023          | 0.10            | 7                   |
|                                      |                                        | 0.07           | 0.023          | 0.10            |                     |
|                                      |                                        | 0.07           | 0.023          | 0.10            |                     |
|                                      |                                        | 0.07           | 0.023          | 0.10            |                     |
|                                      |                                        | 0.12           | 0.023          | 0.10            | 6                   |
|                                      |                                        | 0.15           | 0.023          | 0.10            | 6                   |
|                                      |                                        | 0.15           | 0.023          | 0.10            |                     |
|                                      |                                        | 0.32           | 0.023          | 0.10            | 3                   |
| 0.52                                 | 0.023                                  | 0.10           | 5              |                 |                     |
|                                      | Jiko Poa Rocket <sup>a</sup><br>(n=19) | 0.01           | 0.023          | 0.10            |                     |
|                                      |                                        | 0.01           | 0.023          | 0.10            |                     |
|                                      |                                        | 0.02           | 0.023          | 0.10            |                     |
|                                      |                                        | 0.04           | 0.023          | 0.10            |                     |
|                                      |                                        | 0.04           | 0.023          | 0.10            |                     |
|                                      |                                        | 0.07           | 0.023          | 0.10            |                     |
|                                      |                                        | 0.08           | 0.023          | 0.10            |                     |
|                                      |                                        | 0.40           | 0.023          | 0.10            |                     |
|                                      |                                        | 0.60           | 0.023          | 0.10            |                     |
|                                      |                                        | 0.75           | 0.023          | 0.10            |                     |
| 0.87                                 | 0.023                                  | 0.10           |                |                 |                     |

|                            |      |       |      |
|----------------------------|------|-------|------|
|                            | 0.89 | 0.023 | 0.10 |
|                            | 1.00 | 0.023 | 0.10 |
|                            | 1.12 | 0.023 | 0.10 |
|                            | 1.16 | 0.023 | 0.10 |
|                            | 1.31 | 0.023 | 0.10 |
|                            | 1.31 | 0.023 | 0.10 |
|                            | 1.46 | 0.023 | 0.10 |
|                            | 2.94 | 0.023 | 0.10 |
| <hr/>                      |      |       |      |
| Solgas/Repsol <sup>a</sup> | 0.01 | 0.023 | 0.10 |
| (n=4)                      | 0.03 | 0.023 | 0.10 |
|                            | 0.05 | 0.023 | 0.10 |
|                            | 0.05 | 0.023 | 0.10 |
| <hr/>                      |      |       |      |

<sup>a</sup>Jiko Poa Rocket and Solgas/Repsol stoves were omitted from the group comparisons.

Table S5. R syntax used to test differences in groups of resampled stove data

| Approach                      | R Syntax                                                 |
|-------------------------------|----------------------------------------------------------|
| Uncensored                    |                                                          |
| Full sample                   | <code>geom_stripchart(test.text=TRUE)<sup>a</sup></code> |
| Maximum Likelihood Estimation | <code>cenmle(obs, censored, groups)<sup>b,c</sup></code> |
| After censoring at CCLV       |                                                          |
| Substitute CCLV/2             | <code>geom_stripchart(test.text=TRUE)<sup>a</sup></code> |
| Maximum Likelihood Estimation | <code>cenmle(obs, censored, groups)<sup>b</sup></code>   |

<sup>a</sup>*EnvStats* package <https://cran.r-project.org/web/packages/EnvStats/EnvStats.pdf>. The `geom_stripchart(test.text=TRUE)` function and option specifies one dimensional scatter plots of the data groups; their sample sizes (n), means, 95% confidence intervals for the means, standard deviations (SD); and a two-sample t test for difference of means (i.e., that the difference is zero) assuming normally distributed data.

<sup>b</sup>*NADA* package <https://cran.r-project.org/web/packages/NADA/NADA.pdf>. The `cenmle()` assumes lognormally distributed data and the regression coefficient estimate for “groups” is the magnitude of the difference between the two groups expressed as the ratio of their geometric means, with *p*-value from test that the difference is zero. Alternatively `cenfit()` estimates the group medians and `cendiff()` nonparametrically tests the difference between groups. For more information see [https://www.practicalstats.com/resources/NADA-resources/NADAforR\\_Examples.pdf](https://www.practicalstats.com/resources/NADA-resources/NADAforR_Examples.pdf), page 17.

<sup>c</sup>Logical value of FALSE assigned to ‘censored’ for all observations

Table S6. Akaike Information Criterion (AIC) statistics for the case study

| Data                          | n <sup>a</sup> | Normal | Lognormal | Gamma |
|-------------------------------|----------------|--------|-----------|-------|
| Full sample <sup>b</sup>      | 47             | 83.9   | -27.1     | -15.3 |
| Censored at MDL <sup>c</sup>  | 39             | 144.5  | 34.8      | 39.1  |
| Censored at CCLV <sup>c</sup> | 21             | 203.3  | 93.9      | 90.2  |

<sup>a</sup>Count of observations not censored

<sup>b</sup>AIC calculated using `fitdist()` function in R *fitdistrplus* package

<sup>c</sup>AIC calculated using `fitdistcens()` function in R *fitdistrplus* package

Table S7. Bias (ng/ $\mu$ L) in the case study mean and SD when censoring at the MDL

| Approach                                   | Bias in mean relative to |                  | Bias in SD relative to |                  |
|--------------------------------------------|--------------------------|------------------|------------------------|------------------|
|                                            | Full sample              | MLE <sup>a</sup> | Full sample            | MLE <sup>a</sup> |
| After censoring 8 observations             |                          |                  |                        |                  |
| Substitute MDL/2                           | 0.000                    | n/a <sup>b</sup> | 0.000                  | n/a <sup>b</sup> |
| Maximum Likelihood Estimation <sup>c</sup> | 0.071                    | 0.041            | 1.105                  | 0.384            |
| Robust Regression on Order Statistics      | 0.082                    | 0.052            | 1.202                  | 0.481            |
| Kaplan-Meier                               | 0.002                    | -0.028           | -0.007                 | -0.728           |
| After omitting 8 observations              |                          |                  |                        |                  |
| Complete case                              | 0.070                    | n/a <sup>b</sup> | 0.033                  | n/a <sup>b</sup> |

<sup>a</sup>Maximum likelihood estimate for the full sample assuming lognormal distribution

<sup>b</sup>Bias not estimated because approach is inconsistent with lognormal distributional assumption

<sup>c</sup>Maximum likelihood estimation after censoring assuming lognormal distribution

Table S8. Bias (ng/μL) in the case study mean and SD when censoring at the CCLV

| Approach                                   | Bias in mean relative to |                  | Bias in SD relative to |                  |
|--------------------------------------------|--------------------------|------------------|------------------------|------------------|
|                                            | Full sample              | MLE <sup>a</sup> | Full sample            | MLE <sup>a</sup> |
| After censoring 26 observations            |                          |                  |                        |                  |
| Substitute CCLV/2                          | 0.004                    | n/a <sup>b</sup> | -0.003                 | n/a <sup>b</sup> |
| Maximum Likelihood Estimation <sup>c</sup> | 0.182                    | 0.152            | 2.932                  | 2.211            |
| Maximum Likelihood Estimation <sup>d</sup> | -0.012                   | -0.042           | 0.093                  | -0.628           |
| Robust Regression on Order Statistics      | 0.046                    | 0.016            | 0.471                  | -0.251           |
| Kaplan-Meier                               | 0.032                    | 0.002            | -0.023                 | -0.745           |
| After omitting 26 observations             |                          |                  |                        |                  |
| Complete case                              | 0.387                    | n/a <sup>b</sup> | 0.112                  | n/a <sup>b</sup> |

<sup>a</sup>Maximum likelihood estimation for the full sample assuming lognormal distribution

<sup>b</sup>Bias not estimated because approach is inconsistent with lognormal distributional assumption

<sup>c</sup>Maximum likelihood estimation after censoring assuming lognormal distribution

<sup>d</sup>Maximum likelihood estimation after censoring assuming gamma distribution

Table S9. Results of distribution fitting using AIC for 1,000 samples from moderately skewed lognormal(1, 0.5)

|                                            | Censoring level, n=20 |      |      | Censoring level, n=50 |      |      |
|--------------------------------------------|-----------------------|------|------|-----------------------|------|------|
|                                            | 30%                   | 50%  | 80%  | 30%                   | 50%  | 80%  |
| Proportion Lognormal selected              |                       |      |      |                       |      |      |
| Full sample <sup>a</sup>                   | 0.63                  | 0.65 | 0.67 | 0.72                  | 0.73 | 0.72 |
| Substitute censoring-level/2 <sup>a</sup>  | 0.39                  | 1.00 | 1.00 | 0.46                  | 1.00 | 1.00 |
| Maximum Likelihood Estimation <sup>b</sup> | 0.46                  | 0.37 | 0.29 | 0.55                  | 0.50 | 0.39 |
| Proportion Gamma selected                  |                       |      |      |                       |      |      |
| Full sample <sup>a</sup>                   | 0.32                  | 0.30 | 0.28 | 0.27                  | 0.27 | 0.27 |
| Substitute censoring level/2 <sup>a</sup>  | 0.58                  | 0    | 0    | 0.54                  | 0    | 0    |
| Maximum Likelihood Estimation <sup>b</sup> | 0.42                  | 0.54 | 0.56 | 0.44                  | 0.49 | 0.58 |

<sup>a</sup>AIC calculated using fitdist() function in R *fitdistrplus* package

<sup>b</sup>AIC calculated for censored data using fitdistcens() function in R *fitdistrplus* package

Table S10. Results of distribution fitting using AIC for 1,000 samples from highly skewed lognormal(-2.2, 1.6)

|                                           | Censoring level, n=20 |      |      | Censoring level, n=50 |      |      |
|-------------------------------------------|-----------------------|------|------|-----------------------|------|------|
|                                           | 30%                   | 50%  | 80%  | 30%                   | 50%  | 80%  |
| Proportion Lognormal selected             |                       |      |      |                       |      |      |
| Full sample <sup>a</sup>                  | 0.81                  | 0.80 | 0.80 | 0.95                  | 0.94 | 0.94 |
| Substitute censoring-level/2 <sup>a</sup> | 0.98                  | 1.00 | 1.00 | 1.00                  | 1.00 | 1.00 |
| Maximum Likelihood Estimation             | 0.61                  | 0.51 | 0.30 | 0.81                  | 0.74 | 0.50 |
| Proportion Gamma selected                 |                       |      |      |                       |      |      |
| Full sample                               | 0.19                  | 0.20 | 0.20 | 0.06                  | 0.06 | 0.06 |
| Substitute censoring level/2              | 0.02                  | 0    | 0    | 0                     | 0    | 0    |
| Maximum Likelihood Estimation             | 0.39                  | 0.49 | 0.70 | 0.19                  | 0.27 | 0.50 |

<sup>a</sup>AIC calculated using `fitdist()` function in R *fitdistrplus* package

<sup>b</sup>AIC calculated for censored data using `fitdistcens()` function in R *fitdistrplus* package



Table S11. Bias in the mean of moderately skewed lognormal(1,0.5) distribution from simulation study

| Approach                                               | n  | Censoring | Number  | Average | Min    | Max   |
|--------------------------------------------------------|----|-----------|---------|---------|--------|-------|
|                                                        |    | Level (%) | Samples |         |        |       |
| Full Sample <sup>a</sup>                               | 20 | 30        | 1000    | -0.002  | -0.989 | 1.443 |
|                                                        |    | 50        | 1000    | 0.000   | -1.116 | 1.240 |
|                                                        |    | 80        | 1000    | 0.015   | -0.872 | 1.593 |
|                                                        | 50 | 30        | 1000    | 0.016   | -0.615 | 1.088 |
|                                                        |    | 50        | 1000    | -0.001  | -0.766 | 0.842 |
|                                                        |    | 80        | 1000    | 0.002   | -0.740 | 0.754 |
| Full Sample Maximum Likelihood Estimation <sup>a</sup> | 20 | 30        | 1000    | 0.000   | -0.979 | 1.563 |
|                                                        |    | 50        | 1000    | 0.003   | -1.118 | 1.115 |
|                                                        |    | 80        | 1000    | 0.017   | -0.853 | 1.611 |
|                                                        | 50 | 30        | 1000    | 0.017   | -0.598 | 1.010 |
|                                                        |    | 50        | 1000    | 0.000   | -0.755 | 0.906 |
|                                                        |    | 80        | 1000    | 0.004   | -0.742 | 0.710 |
| Substitute CensoringLevel/2 <sup>b</sup>               | 20 | 30        | 1000    | -0.171  | -1.128 | 1.352 |
|                                                        |    | 50        | 1000    | -0.284  | -1.367 | 1.026 |
|                                                        |    | 80        | 1000    | -0.289  | -1.308 | 1.575 |
|                                                        | 50 | 30        | 1000    | -0.145  | -0.760 | 0.829 |
|                                                        |    | 50        | 1000    | -0.278  | -1.025 | 0.595 |
|                                                        |    | 80        | 1000    | -0.296  | -1.127 | 0.717 |
| Maximum Likelihood Estimation <sup>b</sup>             | 20 | 30        | 1000    | -0.032  | -1.033 | 1.458 |
|                                                        |    | 50        | 1000    | -0.042  | -1.236 | 1.436 |

|                            |    |    |      |        |        |       |
|----------------------------|----|----|------|--------|--------|-------|
|                            |    | 80 | 1000 | 0.049  | -1.372 | 2.786 |
|                            | 50 | 30 | 1000 | -0.005 | -0.606 | 0.936 |
|                            |    | 50 | 1000 | -0.038 | -0.904 | 0.899 |
|                            |    | 80 | 1000 | -0.029 | -1.088 | 1.744 |
| Robust Regression on Order |    |    |      |        |        |       |
| Statistics <sup>b,c</sup>  | 20 | 30 | 583  | -0.041 | -1.012 | 1.276 |
|                            |    | 50 | 458  | -0.064 | -0.993 | 1.164 |
|                            |    | 80 | 441  | 0.012  | -1.454 | 2.784 |
|                            | 50 | 30 | 560  | 0.012  | -0.589 | 0.899 |
|                            |    | 50 | 511  | -0.054 | -0.727 | 0.853 |
|                            |    | 80 | 424  | -0.134 | -1.044 | 1.287 |
| Kaplan-Meier <sup>b</sup>  | 20 | 30 | 1000 | 0.148  | -0.895 | 1.757 |
|                            |    | 50 | 1000 | 0.400  | -0.952 | 2.113 |
|                            |    | 80 | 1000 | 1.391  | -0.267 | 4.498 |
|                            | 50 | 30 | 1000 | 0.171  | -0.470 | 1.215 |
|                            |    | 50 | 1000 | 0.403  | -0.517 | 1.410 |
|                            |    | 80 | 1000 | 1.374  | 0.028  | 3.111 |
| Complete Case <sup>b</sup> | 20 | 30 | 1000 | 0.621  | -0.664 | 2.672 |
|                            |    | 50 | 1000 | 1.143  | -0.485 | 3.189 |
|                            |    | 80 | 1000 | 2.475  | 0.257  | 6.857 |
|                            | 50 | 30 | 1000 | 0.661  | -0.179 | 1.952 |
|                            |    | 50 | 1000 | 1.160  | -0.102 | 2.644 |
|                            |    | 80 | 1000 | 2.492  | 0.853  | 5.119 |

---

<sup>a</sup>Full, uncensored sample

<sup>b</sup>After censoring

<sup>c</sup>Bias was estimated only for samples where lognormal was the selected distribution because the R *EnvStats* package does not currently support gamma distributions for this approach

Table S12. Bias in the mean of highly skewed lognormal(-2.2,1.6) distribution from simulation study

| Approach                                               | Censoring |           | Number  | Average | Min    | Max    |
|--------------------------------------------------------|-----------|-----------|---------|---------|--------|--------|
|                                                        | n         | Level (%) | Samples |         |        |        |
| Full Sample <sup>a</sup>                               | 20        | 30        | 1000    | 0.002   | -0.316 | 9.263  |
|                                                        |           | 50        | 1000    | -0.004  | -0.334 | 3.842  |
|                                                        |           | 80        | 1000    | 0.008   | -0.333 | 10.163 |
|                                                        | 50        | 30        | 1000    | 0.001   | -0.273 | 1.753  |
|                                                        |           | 50        | 1000    | -0.001  | -0.272 | 1.754  |
|                                                        |           | 80        | 1000    | 0.002   | -0.275 | 2.179  |
| Full Sample Maximum Likelihood Estimation <sup>a</sup> | 20        | 30        | 1000    | 0.037   | -0.316 | 3.843  |
|                                                        |           | 50        | 1000    | 0.044   | -0.336 | 2.402  |
|                                                        |           | 80        | 1000    | 0.041   | -0.330 | 3.427  |
|                                                        | 50        | 30        | 1000    | 0.010   | -0.250 | 0.750  |
|                                                        |           | 50        | 1000    | 0.008   | -0.274 | 0.878  |
|                                                        |           | 80        | 1000    | 0.013   | -0.280 | 1.079  |
| Substitute CensoringLevel/2 <sup>b</sup>               | 20        | 30        | 1000    | 0.002   | -0.317 | 9.262  |
|                                                        |           | 50        | 1000    | 0.002   | -0.334 | 3.852  |
|                                                        |           | 80        | 1000    | 0.101   | -0.332 | 10.343 |
|                                                        | 50        | 30        | 1000    | 0.001   | -0.273 | 1.751  |
|                                                        |           | 50        | 1000    | 0.005   | -0.273 | 1.761  |
|                                                        |           | 80        | 1000    | 0.087   | -0.257 | 2.252  |

|                                                      |    |    |      |        |        |        |
|------------------------------------------------------|----|----|------|--------|--------|--------|
| Maximum Likelihood Estimation <sup>b</sup>           | 20 | 30 | 1000 | 0.011  | -0.317 | 4.759  |
|                                                      |    | 50 | 1000 | 0.004  | -0.329 | 2.292  |
|                                                      |    | 80 | 1000 | 0.099  | -0.338 | 73.882 |
|                                                      | 50 | 30 | 1000 | 0.001  | -0.273 | 1.234  |
|                                                      |    | 50 | 1000 | -0.002 | -0.278 | 1.357  |
|                                                      |    | 80 | 1000 | 0.000  | -0.279 | 2.344  |
| Robust Regression on Order Statistics <sup>b,c</sup> | 20 | 30 | 611  | 0.058  | -0.314 | 9.260  |
|                                                      |    | 50 | 506  | 0.048  | -0.336 | 3.822  |
|                                                      |    | 80 | 300  | 0.078  | -0.338 | 10.095 |
|                                                      | 50 | 30 | 807  | 0.020  | -0.272 | 1.749  |
|                                                      |    | 50 | 735  | 0.025  | -0.250 | 1.738  |
|                                                      |    | 80 | 500  | 0.032  | -0.290 | 2.106  |
| Kaplan-Meier <sup>b</sup>                            | 20 | 30 | 1000 | 0.010  | -0.312 | 9.265  |
|                                                      |    | 50 | 1000 | 0.034  | -0.328 | 3.891  |
|                                                      |    | 80 | 1000 | 0.295  | -0.294 | 10.608 |
|                                                      | 50 | 30 | 1000 | 0.009  | -0.266 | 1.756  |
|                                                      |    | 50 | 1000 | 0.034  | -0.260 | 1.796  |
|                                                      |    | 80 | 1000 | 0.265  | -0.201 | 2.422  |
| Complete Case <sup>b</sup>                           | 20 | 30 | 1000 | 0.162  | -0.290 | 13.398 |
|                                                      |    | 50 | 1000 | 0.340  | -0.281 | 8.023  |
|                                                      |    | 80 | 1000 | 1.133  | -0.252 | 51.987 |
|                                                      | 50 | 30 | 1000 | 0.162  | -0.228 | 2.666  |
|                                                      |    | 50 | 1000 | 0.351  | -0.176 | 3.849  |
|                                                      |    | 80 | 1000 | 1.138  | 0.027  | 12.001 |

---

<sup>a</sup>Full, uncensored sample

<sup>b</sup>After censoring

<sup>c</sup>Bias was estimated only for samples where lognormal was the selected distribution because the R *EnvStats* package does not currently support gamma distributions for this approach

Table S13. Bias in the standard deviation of moderately skewed lognormal(1,0.5) distribution from simulation study

| Approach                                               | Censoring |           | Number  | Average | Min    | Max   |
|--------------------------------------------------------|-----------|-----------|---------|---------|--------|-------|
|                                                        | n         | Level (%) | Samples |         |        |       |
| Full Sample <sup>a</sup>                               | 20        | 30        | 1000    | -0.063  | -1.050 | 2.131 |
|                                                        |           | 50        | 1000    | -0.062  | -1.018 | 2.147 |
|                                                        |           | 80        | 1000    | -0.038  | -0.910 | 2.494 |
|                                                        | 50        | 30        | 1000    | -0.010  | -0.747 | 1.554 |
|                                                        |           | 50        | 1000    | -0.030  | -0.796 | 1.557 |
|                                                        |           | 80        | 1000    | -0.035  | -0.731 | 1.506 |
| Full Sample Maximum Likelihood Estimation <sup>a</sup> | 20        | 30        | 1000    | -0.056  | -1.055 | 2.076 |
|                                                        |           | 50        | 1000    | -0.045  | -1.006 | 1.429 |
|                                                        |           | 80        | 1000    | -0.032  | -0.915 | 1.594 |
|                                                        | 50        | 30        | 1000    | 0.002   | -0.639 | 1.318 |
|                                                        |           | 50        | 1000    | -0.017  | -0.718 | 0.975 |
|                                                        |           | 80        | 1000    | -0.018  | -0.698 | 0.973 |
| Substitute CensoringLevel/2 <sup>b</sup>               | 20        | 30        | 1000    | 0.104   | -0.795 | 2.215 |
|                                                        |           | 50        | 1000    | 0.128   | -0.779 | 2.316 |
|                                                        |           | 80        | 1000    | -0.112  | -0.890 | 2.373 |
|                                                        | 50        | 30        | 1000    | 0.143   | -0.548 | 1.658 |

|                                                      |    |    |      |        |        |       |
|------------------------------------------------------|----|----|------|--------|--------|-------|
|                                                      |    | 50 | 1000 | 0.149  | -0.613 | 1.670 |
|                                                      |    | 80 | 1000 | -0.099 | -0.658 | 1.443 |
| Maximum Likelihood Estimation <sup>b</sup>           | 20 | 30 | 1000 | -0.084 | -1.060 | 1.963 |
|                                                      |    | 50 | 1000 | -0.059 | -1.082 | 1.800 |
|                                                      |    | 80 | 1000 | -0.080 | -1.455 | 2.423 |
|                                                      | 50 | 30 | 1000 | -0.024 | -0.834 | 1.100 |
|                                                      |    | 50 | 1000 | -0.023 | -0.841 | 1.198 |
|                                                      |    | 80 | 1000 | -0.028 | -1.122 | 1.797 |
| Robust Regression on Order Statistics <sup>b,c</sup> | 20 | 30 | 583  | 0.027  | -1.076 | 2.181 |
|                                                      |    | 50 | 458  | -0.007 | -1.063 | 2.335 |
|                                                      |    | 80 | 441  | -0.171 | -1.599 | 2.828 |
|                                                      | 50 | 30 | 560  | 0.108  | -0.664 | 1.604 |
|                                                      |    | 50 | 511  | 0.051  | -0.770 | 1.664 |
|                                                      |    | 80 | 424  | 0.016  | -1.126 | 1.782 |
| Kaplan-Meier <sup>b</sup>                            | 20 | 30 | 1000 | -0.253 | -1.168 | 1.948 |
|                                                      |    | 50 | 1000 | -0.435 | -1.306 | 1.795 |
|                                                      |    | 80 | 1000 | -0.887 | -1.589 | 1.725 |
|                                                      | 50 | 30 | 1000 | -0.175 | -0.980 | 1.409 |
|                                                      |    | 50 | 1000 | -0.367 | -1.122 | 1.319 |
|                                                      |    | 80 | 1000 | -0.819 | -1.486 | 0.856 |
| Complete Case <sup>b</sup>                           | 20 | 30 | 1000 | -0.181 | -1.236 | 2.540 |
|                                                      |    | 50 | 1000 | -0.240 | -1.285 | 2.955 |
|                                                      |    | 80 | 1000 | -0.317 | -1.623 | 5.755 |
|                                                      | 50 | 30 | 1000 | -0.118 | -0.994 | 1.778 |

|    |      |        |        |       |
|----|------|--------|--------|-------|
| 50 | 1000 | -0.170 | -1.113 | 2.302 |
| 80 | 1000 | -0.242 | -1.412 | 3.709 |

<sup>a</sup>Full, uncensored sample

<sup>b</sup>After censoring

<sup>c</sup>Bias was estimated only for samples where lognormal was the selected distribution because the R *EnvStats* package does not currently support gamma distributions for this approach

Table S14. Bias in the standard deviation of highly skewed lognormal(-2.2,1.6) distribution from simulation study

| Approach                                               | Censoring |           | Number  | Average | Min    | Max     |
|--------------------------------------------------------|-----------|-----------|---------|---------|--------|---------|
|                                                        | n         | Level (%) | Samples |         |        |         |
| Full Sample <sup>a</sup>                               | 20        | 30        | 1000    | -0.574  | -1.307 | 40.526  |
|                                                        |           | 50        | 1000    | -0.606  | -1.290 | 16.458  |
|                                                        |           | 80        | 1000    | -0.538  | -1.328 | 44.131  |
|                                                        | 50        | 30        | 1000    | -0.434  | -1.205 | 10.682  |
|                                                        |           | 50        | 1000    | -0.426  | -1.264 | 11.025  |
|                                                        |           | 80        | 1000    | -0.421  | -1.205 | 13.580  |
| Full Sample Maximum Likelihood Estimation <sup>a</sup> | 20        | 30        | 1000    | 0.547   | -1.281 | 105.100 |
|                                                        |           | 50        | 1000    | 0.588   | -1.242 | 33.690  |
|                                                        |           | 80        | 1000    | 0.640   | -1.309 | 122.072 |
|                                                        | 50        | 30        | 1000    | 0.137   | -1.137 | 7.692   |
|                                                        |           | 50        | 1000    | 0.139   | -1.185 | 9.776   |
|                                                        |           | 80        | 1000    | 0.174   | -1.146 | 13.974  |
| Substitute CensoringLevel/2 <sup>b</sup>               | 20        | 30        | 1000    | -0.574  | -1.306 | 40.527  |

|                                                      |    |    |      |         |        |            |
|------------------------------------------------------|----|----|------|---------|--------|------------|
|                                                      |    | 50 | 1000 | -0.610  | -1.294 | 16.456     |
|                                                      |    | 80 | 1000 | -0.591  | -1.342 | 44.087     |
|                                                      | 50 | 30 | 1000 | -0.435  | -1.204 | 10.682     |
|                                                      |    | 50 | 1000 | -0.429  | -1.269 | 11.024     |
|                                                      |    | 80 | 1000 | -0.458  | -1.229 | 13.567     |
| Maximum Likelihood Estimation <sup>b</sup>           | 20 | 30 | 1000 | 0.724   | -1.302 | 367.790    |
|                                                      |    | 50 | 1000 | 0.433   | -1.296 | 98.637     |
|                                                      |    | 80 | 1000 | 268.041 | -1.343 | 264318.781 |
|                                                      | 50 | 30 | 1000 | 0.099   | -1.209 | 25.532     |
|                                                      |    | 50 | 1000 | 0.151   | -1.257 | 22.015     |
|                                                      |    | 80 | 1000 | 0.962   | -1.197 | 221.689    |
| Robust Regression on Order Statistics <sup>b,c</sup> | 20 | 30 | 611  | -0.336  | -1.257 | 40.527     |
|                                                      |    | 50 | 506  | -0.337  | -1.270 | 16.463     |
|                                                      |    | 80 | 300  | -0.023  | -1.344 | 44.147     |
|                                                      | 50 | 30 | 807  | -0.322  | -1.199 | 10.683     |
|                                                      |    | 50 | 735  | -0.269  | -1.182 | 11.028     |
|                                                      |    | 80 | 500  | -0.111  | -1.171 | 13.592     |
| Kaplan-Meier <sup>b</sup>                            | 20 | 30 | 1000 | -0.599  | -1.312 | 39.465     |
|                                                      |    | 50 | 1000 | -0.646  | -1.310 | 15.995     |
|                                                      |    | 80 | 1000 | -0.683  | -1.366 | 42.874     |
|                                                      | 50 | 30 | 1000 | -0.448  | -1.210 | 10.560     |
|                                                      |    | 50 | 1000 | -0.451  | -1.288 | 10.893     |
|                                                      |    | 80 | 1000 | -0.524  | -1.294 | 13.389     |
| Complete Case <sup>b</sup>                           | 20 | 30 | 1000 | -0.461  | -1.309 | 48.672     |



|    |    |      |        |        |        |
|----|----|------|--------|--------|--------|
|    | 50 | 1000 | -0.397 | -1.296 | 23.776 |
|    | 80 | 1000 | 0.023  | -1.362 | 99.621 |
| 50 | 30 | 1000 | -0.291 | -1.196 | 13.004 |
|    | 50 | 1000 | -0.131 | -1.288 | 16.084 |
|    | 80 | 1000 | 0.323  | -1.260 | 31.545 |

<sup>a</sup>Full, uncensored sample

<sup>b</sup>After censoring

<sup>c</sup>Bias was estimated only for samples where lognormal was the selected distribution because the R *EnvStats* package does not currently support gamma distributions for this approach

Table S15. Coverage of 95% approximate confidence intervals for the mean<sup>a</sup> from the simulation study for the moderately skewed lognormal distribution

| Approach                                               | n  | Censoring Level (%) | Number Samples | 95% CI Coverage |
|--------------------------------------------------------|----|---------------------|----------------|-----------------|
| Full Sample <sup>b</sup>                               | 20 | 30                  | 1000           | 93.6            |
|                                                        |    | 50                  | 1000           | 95.0            |
|                                                        |    | 80                  | 1000           | 93.6            |
|                                                        | 50 | 30                  | 1000           | 95.0            |
|                                                        |    | 50                  | 1000           | 94.2            |
|                                                        |    | 80                  | 1000           | 92.5            |
| Full Sample Maximum Likelihood Estimation <sup>b</sup> | 20 | 30                  | 1000           | 93.4            |
|                                                        |    | 50                  | 1000           | 94.9            |
|                                                        |    | 80                  | 1000           | 93.5            |
|                                                        | 50 | 30                  | 1000           | 96.0            |

|                                                      |    |    |      |      |
|------------------------------------------------------|----|----|------|------|
|                                                      |    | 50 | 1000 | 94.9 |
|                                                      |    | 80 | 1000 | 94.4 |
| Substitute CensoringLevel/2 <sup>c</sup>             | 20 | 30 | 1000 | 90.3 |
|                                                      |    | 50 | 1000 | 87.5 |
|                                                      |    | 80 | 1000 | 75.7 |
|                                                      | 50 | 30 | 1000 | 90.8 |
|                                                      |    | 50 | 1000 | 76.8 |
|                                                      |    | 80 | 1000 | 63.8 |
| Maximum Likelihood Estimation <sup>c</sup>           | 20 | 30 | 1000 | 92.0 |
|                                                      |    | 50 | 1000 | 92.8 |
|                                                      |    | 80 | 1000 | 77.2 |
|                                                      | 50 | 30 | 1000 | 94.4 |
|                                                      |    | 50 | 1000 | 91.1 |
|                                                      |    | 80 | 1000 | 75.4 |
| Robust Regression on Order Statistics <sup>c,d</sup> | 20 | 30 | 583  | 93.1 |
|                                                      |    | 50 | 458  | 93.0 |
|                                                      |    | 80 | 441  | 64.9 |
|                                                      | 50 | 30 | 560  | 96.1 |
|                                                      |    | 50 | 511  | 92.4 |
|                                                      |    | 80 | 424  | 67.7 |
| Kaplan-Meier <sup>c</sup>                            | 20 | 30 | 1000 | 89.1 |
|                                                      |    | 50 | 1000 | 67.1 |
|                                                      |    | 80 | 1000 | 3.8  |

|                            |    |    |      |      |
|----------------------------|----|----|------|------|
|                            | 50 | 30 | 1000 | 86.4 |
|                            |    | 50 | 1000 | 42.3 |
|                            |    | 80 | 1000 | 0.2% |
| Complete Case <sup>c</sup> | 20 | 30 | 1000 | 56.7 |
|                            |    | 50 | 1000 | 12.7 |
|                            |    | 80 | 1000 | 0.0  |
|                            | 50 | 30 | 1000 | 18.1 |
|                            |    | 50 | 1000 | 0.9  |
|                            |    | 80 | 1000 | 0.0  |

<sup>a</sup>Approximate confidence intervals of the form (sample mean)  $\pm t_{n-1}(\text{standard deviation})/\sqrt{n}$

<sup>b</sup>Full uncensored sample

<sup>c</sup>After censoring

<sup>d</sup>Estimation only for samples where lognormal was the selected distribution because the R *EnvStats* package does not currently support gamma distributions for this approach

Table S16. Coverage of 95% approximate confidence intervals for the mean<sup>a</sup> from the simulation study for the highly skewed lognormal distribution

| Approach                 | n  | Censoring | Number  | 95% CI   |
|--------------------------|----|-----------|---------|----------|
|                          |    | Level (%) | Samples | Coverage |
| Full Sample <sup>b</sup> | 20 | 30        | 1000    | 76.0     |
|                          |    | 50        | 1000    | 74.3     |
|                          |    | 80        | 1000    | 74.2     |
|                          | 50 | 30        | 1000    | 79.8     |
|                          |    | 50        | 1000    | 80.0     |

|                                                        |    |    |      |      |
|--------------------------------------------------------|----|----|------|------|
|                                                        |    | 80 | 1000 | 79.1 |
| Full Sample Maximum Likelihood Estimation <sup>b</sup> | 20 | 30 | 1000 | 89.5 |
|                                                        |    | 50 | 1000 | 90.0 |
|                                                        |    | 80 | 1000 | 89.5 |
|                                                        | 50 | 30 | 1000 | 94.2 |
|                                                        |    | 50 | 1000 | 92.8 |
|                                                        |    | 80 | 1000 | 94.5 |
| Substitute CensoringLevel/2 <sup>c</sup>               | 20 | 30 | 1000 | 75.8 |
|                                                        |    | 50 | 1000 | 75.1 |
|                                                        |    | 80 | 1000 | 73.2 |
|                                                        | 50 | 30 | 1000 | 79.8 |
|                                                        |    | 50 | 1000 | 81.2 |
|                                                        |    | 80 | 1000 | 83.8 |
| Maximum Likelihood Estimation <sup>c</sup>             | 20 | 30 | 1000 | 80.4 |
|                                                        |    | 50 | 1000 | 77.5 |
|                                                        |    | 80 | 1000 | 74.4 |
|                                                        | 50 | 30 | 1000 | 86.6 |
|                                                        |    | 50 | 1000 | 83.0 |
|                                                        |    | 80 | 1000 | 79.7 |
| Robust Regression on Order Statistics <sup>c,d</sup>   | 20 | 30 | 583  | 85.1 |
|                                                        |    | 50 | 458  | 81.2 |
|                                                        |    | 80 | 441  | 80.3 |

|                            |    |    |      |      |
|----------------------------|----|----|------|------|
|                            | 50 | 30 | 560  | 84.8 |
|                            |    | 50 | 511  | 86.4 |
|                            |    | 80 | 424  | 84.8 |
| Kaplan-Meier <sup>c</sup>  | 20 | 30 | 1000 | 75.9 |
|                            |    | 50 | 1000 | 76.7 |
|                            |    | 80 | 1000 | 48.3 |
|                            | 50 | 30 | 1000 | 80.9 |
|                            |    | 50 | 1000 | 83.3 |
|                            |    | 80 | 1000 | 44.8 |
| Complete Case <sup>c</sup> | 20 | 30 | 1000 | 85.9 |
|                            |    | 50 | 1000 | 70.4 |
|                            |    | 80 | 1000 | 9.3  |
|                            | 50 | 30 | 1000 | 87.7 |
|                            |    | 50 | 1000 | 49.8 |
|                            |    | 80 | 1000 | 0.3  |

<sup>a</sup>Approximate confidence intervals of the form (sample mean)  $\pm t_{n-1}(\text{standard deviation})/\sqrt{n}$

<sup>b</sup>Full uncensored sample

<sup>c</sup>After censoring

<sup>d</sup>Estimation only for samples where lognormal was the selected distribution because the R *EnvStats* package does not currently support gamma distributions for this approach

Table S17. Akaike Information Criterion (AIC) statistics for the group comparison

| Data                          | n not    | Normal | Lognormal | Gamma  |
|-------------------------------|----------|--------|-----------|--------|
|                               | censored |        |           |        |
| Full sample <sup>a</sup>      | 85       | -112.1 | -205.2    | -201.3 |
| Censored at CCLV <sup>b</sup> | 32       | 119.9  | 32.5      | 35.8   |

<sup>a</sup>AIC calculated using `fitdist()` function in R *fitdistrplus* package

<sup>b</sup>AIC calculated using `fitdistcens()` function in R *fitdistrplus* package

Table S18. Tests of group differences for resampled case study data for censoring at the MDL

| Approach                                     | Distribution | Stove Type 1 |                      | Stove Type 2 |                      | <i>p</i> -value    |
|----------------------------------------------|--------------|--------------|----------------------|--------------|----------------------|--------------------|
|                                              |              | n            | Mean ± SD<br>(ng/μL) | n            | Mean ± SD<br>(ng/μL) |                    |
| Uncensored                                   |              |              |                      |              |                      |                    |
| Full sample                                  | Normal       | 45           | 0.139 ± 0.156        | 40           | 0.079 ± 0.056        | 0.023 <sup>a</sup> |
| Maximum Likelihood Estimation                | Lognormal    | 45           | 0.145 ± 0.225        | 40           | 0.089 ± 0.115        | 0.103 <sup>b</sup> |
| After censoring 16 observations <sup>c</sup> |              |              |                      |              |                      |                    |
| Substitute MDL/2                             | Normal       | 45           | 0.139 ± 0.156        | 40           | 0.078 ± 0.056        | 0.022 <sup>a</sup> |
| Maximum Likelihood Estimation                | Lognormal    | 45           | 0.142 ± 0.203        | 40           | 0.089 ± 0.109        | 0.083 <sup>b</sup> |

<sup>a</sup>Test for difference of means (i.e., that difference of means is zero)

<sup>b</sup>Test for the difference between the two groups expressed as the ratio of their geometric means

<sup>c</sup>Stove 1: 5 observations were censored; Stove 2: 11 observations were censored

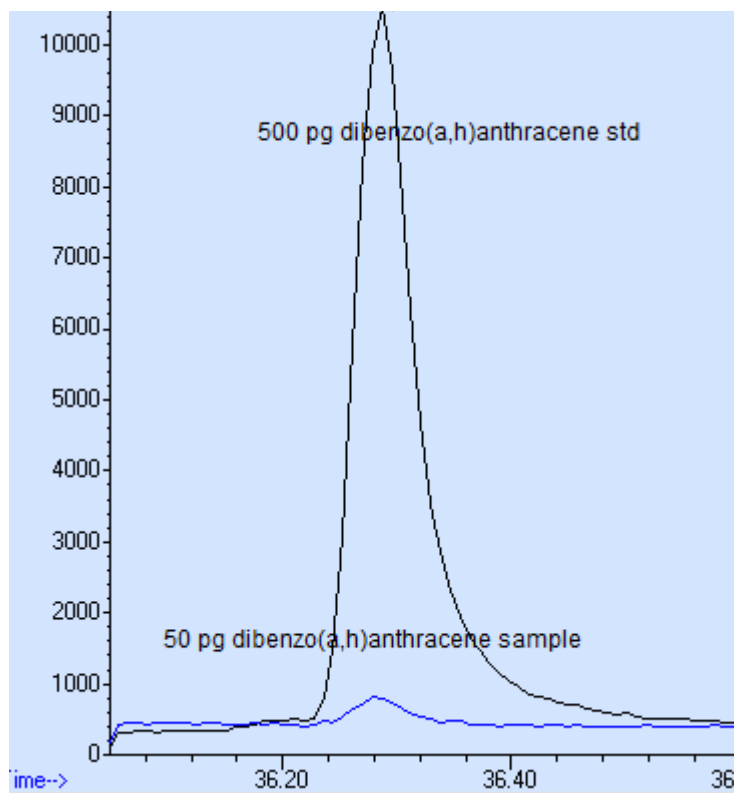

Figure S1. Example chromatogram of dibenzo(a,h)anthracene (DBA) standard (std; black line) and sample (blue line) with chromatographic retention time on the x-axis and response intensity on the y-axis.

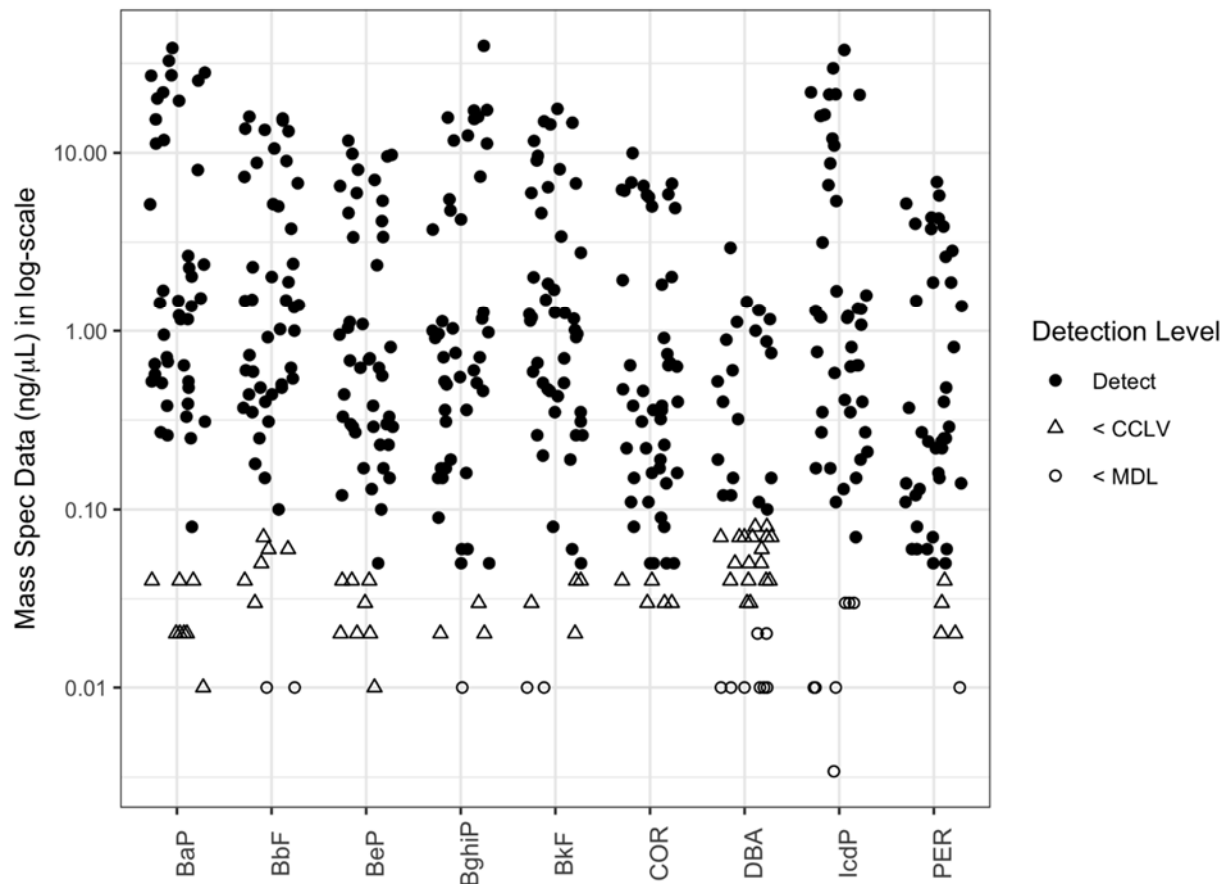

Figure S2. Concentration measurements below the method detection limits (MDL) are represented by open circles, and values between the MDL and the calibration curve lowest value (CCLV) are represented by open triangles. Concentration measurements above the calibration curve lowest value are labeled “Detect” and displayed as closed circles. Analytes are BaP = Benzo(a)pyrene, BbF = Benzo(b)fluoranthene, BeP = Benzo(e)pyrene, BghiP = Benzo(g,h,i)pyrene, BkF = Benzo(k)fluoranthene, COR = Coronene, DBA = Dibenzo[a,h]anthracene, IcdP = Indeno[1,2,3-c,d]pyrene, PER = Perylene. MDL and CCLV values and detection level category counts are given in Table S1 for each analyte.



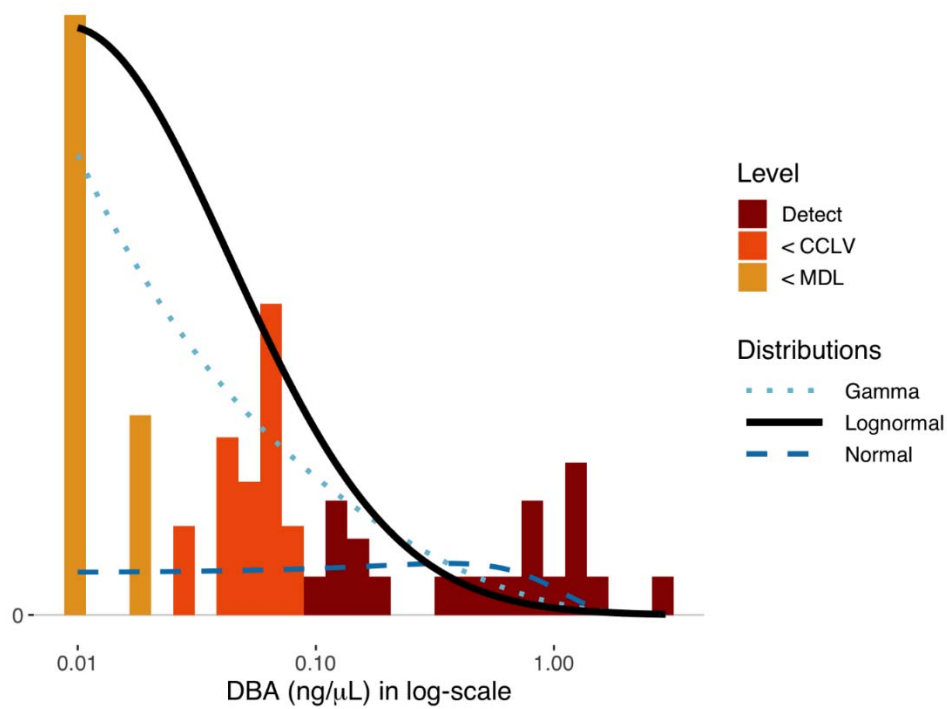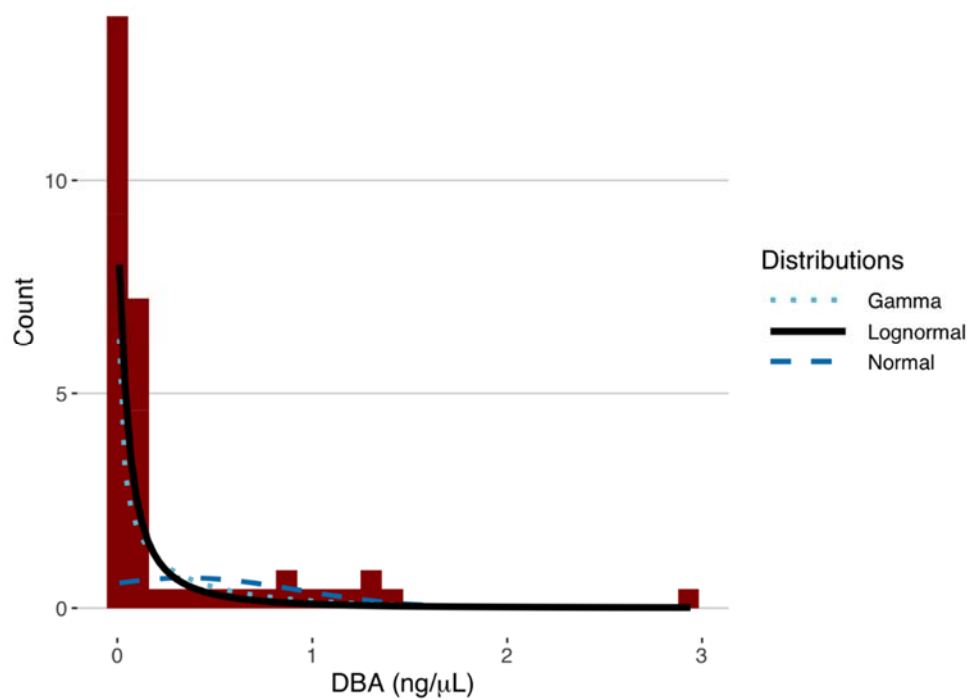

Figure S3. Histograms of the dibenzo[a,h]anthracene (DBA) samples (n=47) with log-scale x-axis (top panel) and original scale x-axis (bottom panel). Method Detection Limit (MDL) is 0.023 and Calibration Curve Lowest Value (CCLV) is 0.10.

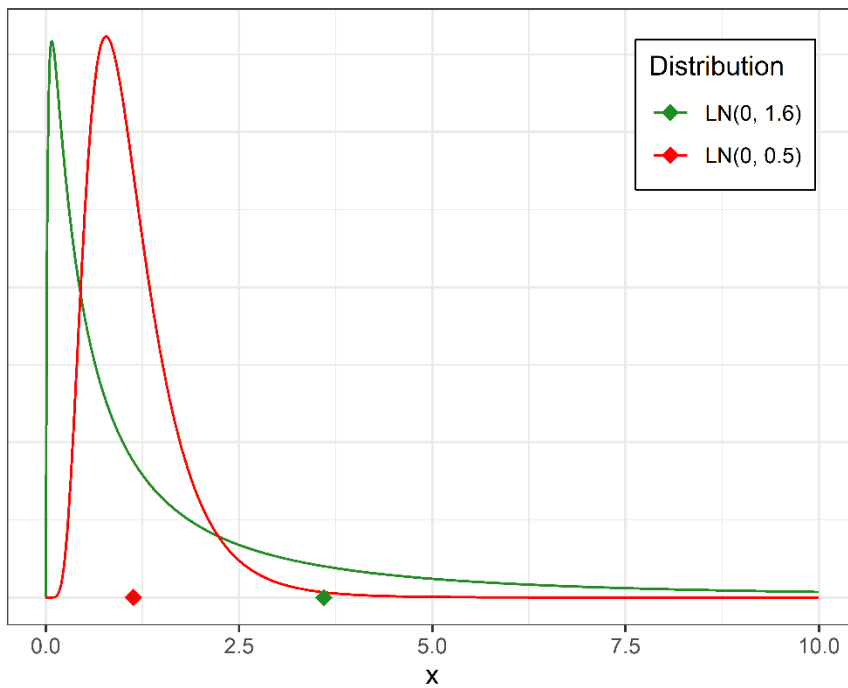

Figure S4. Lognormal distributions from the simulation study adjusted to have  $\mu_{\log}=0$ , and therefore median of  $e^0=1$ , to contrast their means (indicated by diamonds) and variance characteristics. The distribution with  $\sigma_{\log}=1.6$  has a larger mean than the distribution with  $\sigma_{\log}=0.5$ .

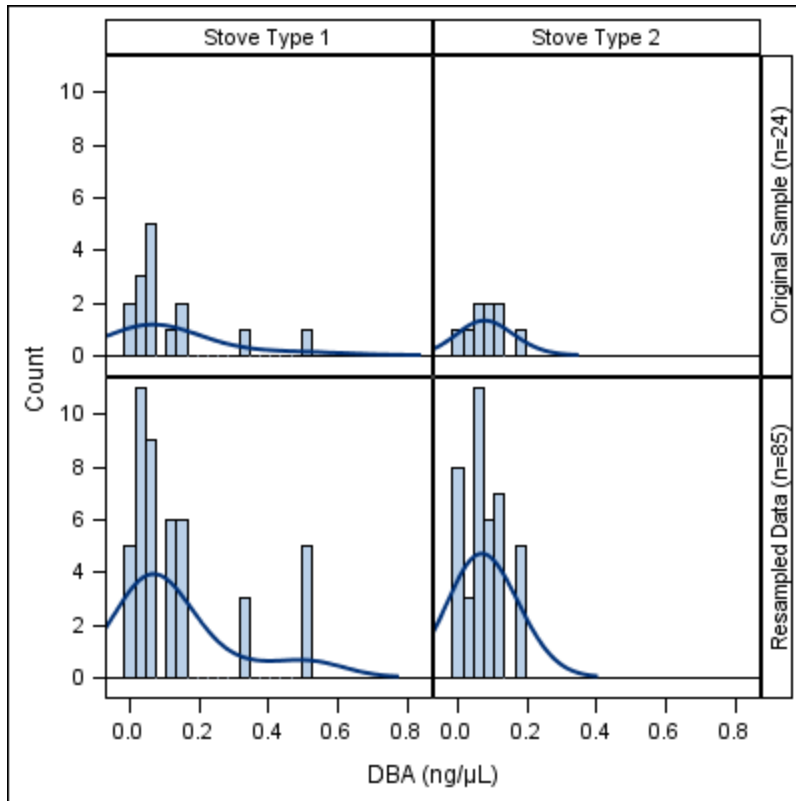

Figure S5. Histograms of original and resampled stove-specific data from the case study with kernel densities.

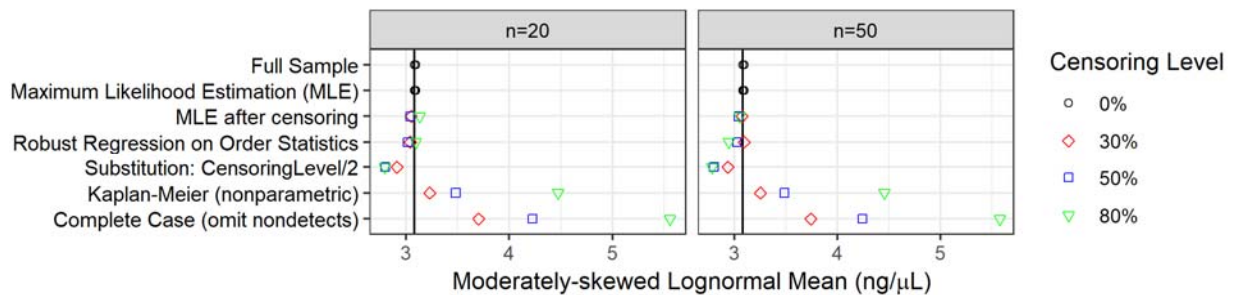

Figure S6. Bias in estimates of the mean from the simulation study for the moderately skewed distribution is the difference of the estimated means shown here and the true mean, which is indicated by the reference line. The true mean is approximately 3.08.

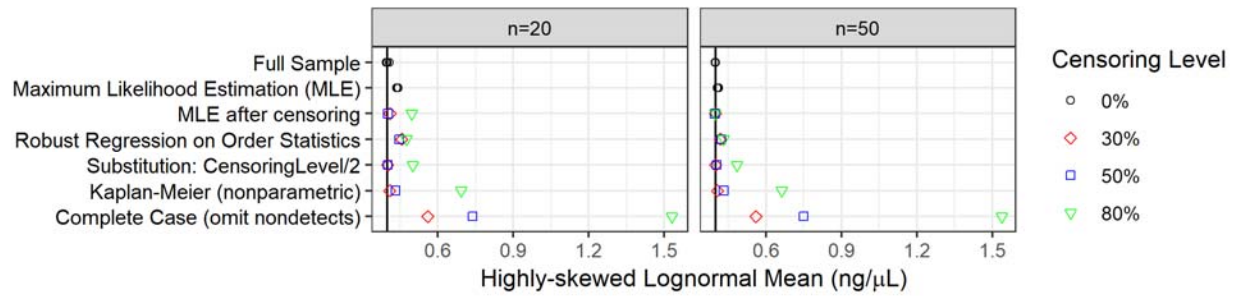

Figure S7. Bias in estimates of the mean from the simulation study for the highly skewed distribution is the difference of the estimated means shown here and the true mean, which is indicated by the reference line. The true mean is approximately 0.40.

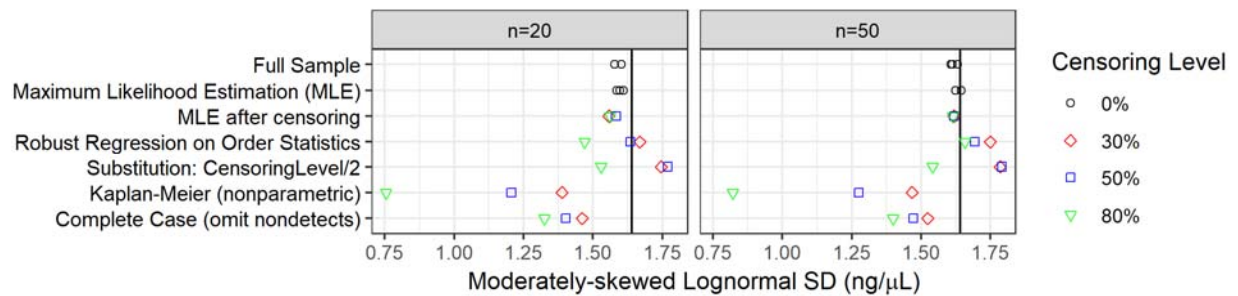

Figure S8. Bias in estimates of the standard deviation from the simulation study for the moderately skewed distribution is the difference of the estimated standard deviations shown here and the true standard deviation, which is indicated by the reference line. The true standard deviation is approximately 1.64.

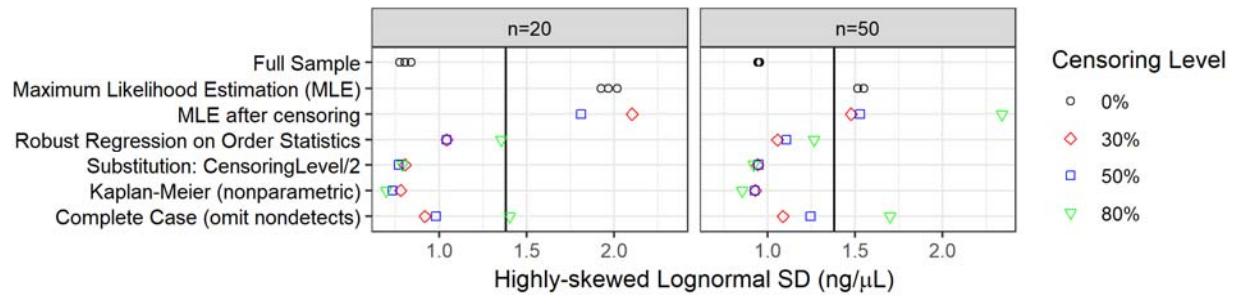

Figure S9. Bias in estimates of the standard deviation from the simulation study for the highly skewed distribution is the difference of the estimated standard deviations shown here and the true standard deviation, which is indicated by the reference line. The true standard deviation is approximately 1.38. Note: MLE after censoring estimate for n=20 and censoring level 80% is 269.4 and is omitted.

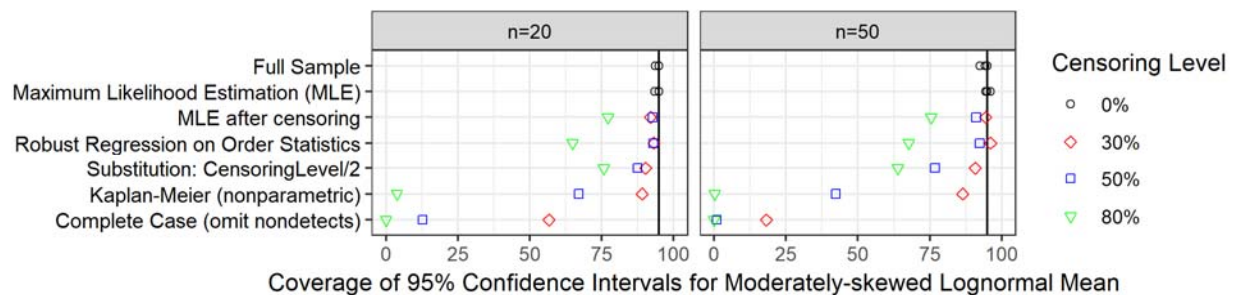

Figure S10. Coverage of 95% approximate confidence intervals of the form  $(\text{sample mean}) \pm t_{n-1}(\text{standard deviation})/\sqrt{n}$  for the mean from the simulation study for the moderately skewed distribution. Reference line indicates 95% coverage.

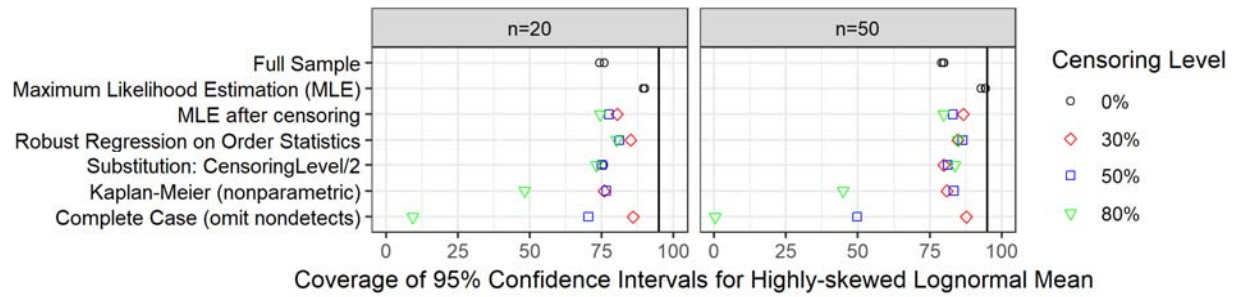

Figure S11. Coverage of 95% approximate confidence intervals of the form  $(\text{sample mean}) \pm t_{n-1}(\text{standard deviation})/\sqrt{n}$  for the mean from the simulation study for the highly skewed distribution. Reference line indicates 95% coverage.

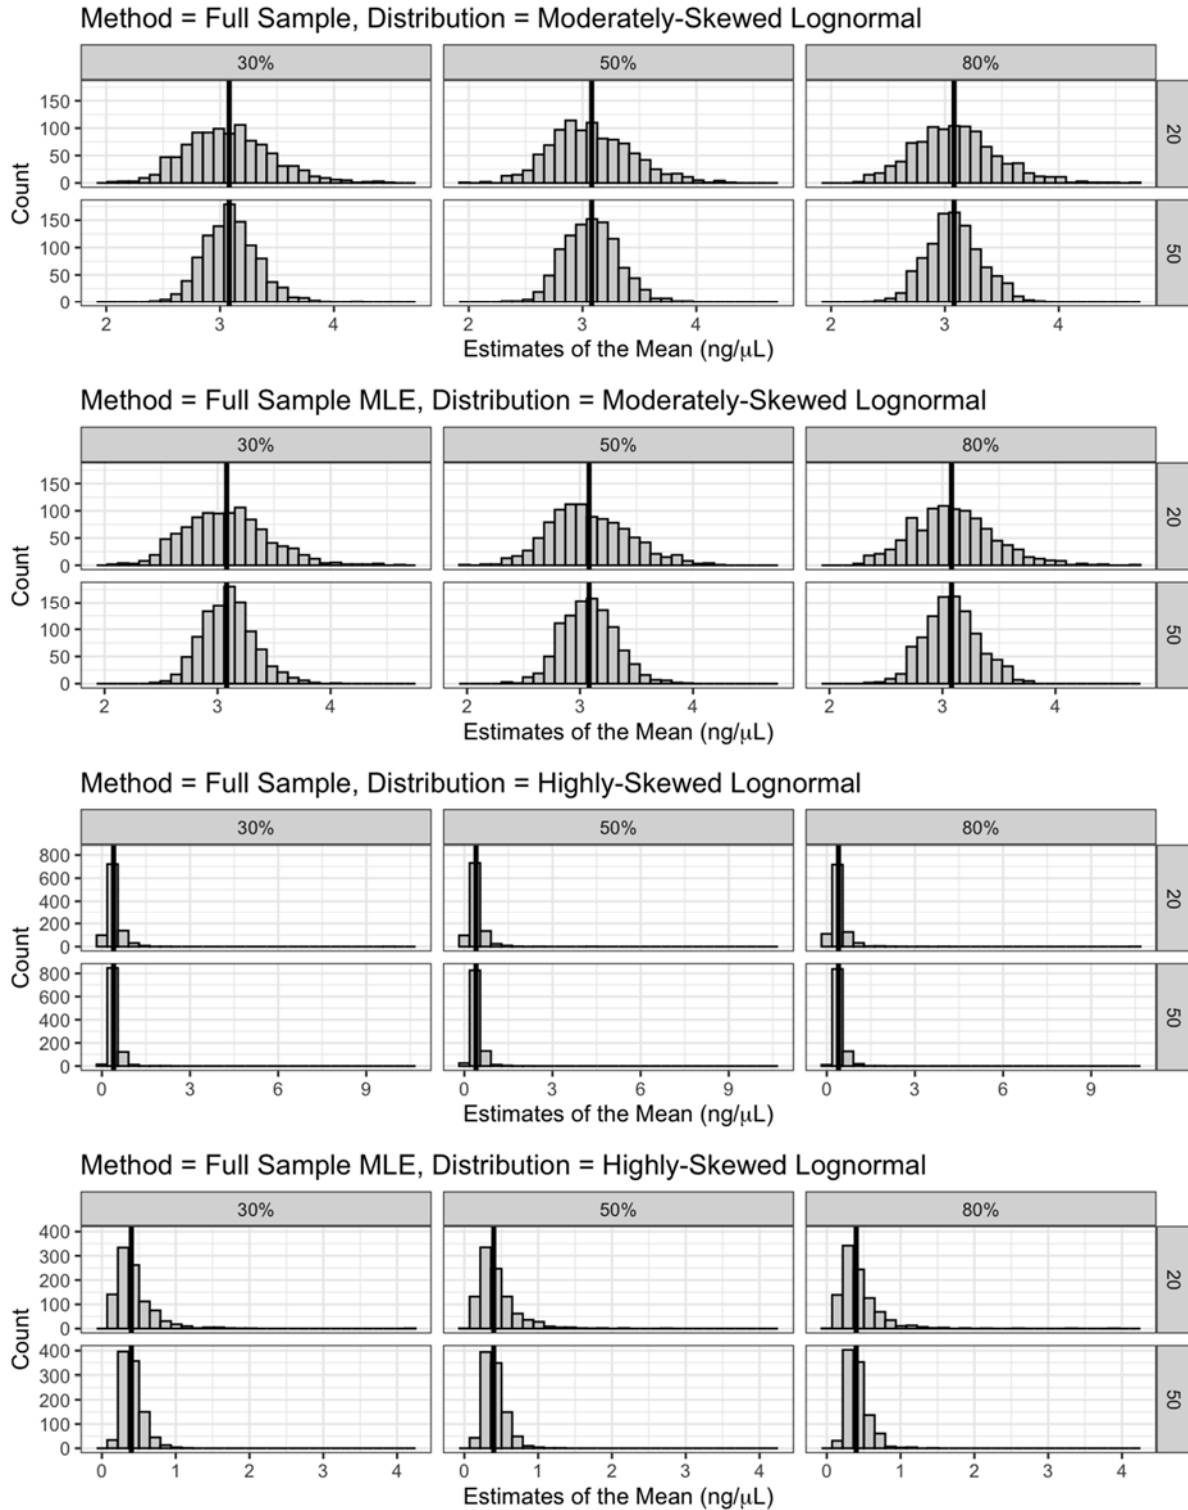

Figure S12. Histograms of simulation study results for full-sample and full sample maximum likelihood means for the moderately and highly skewed lognormal distributions, for censoring levels of 30%, 50%, and 80%, and for sample sizes 20 and 50.

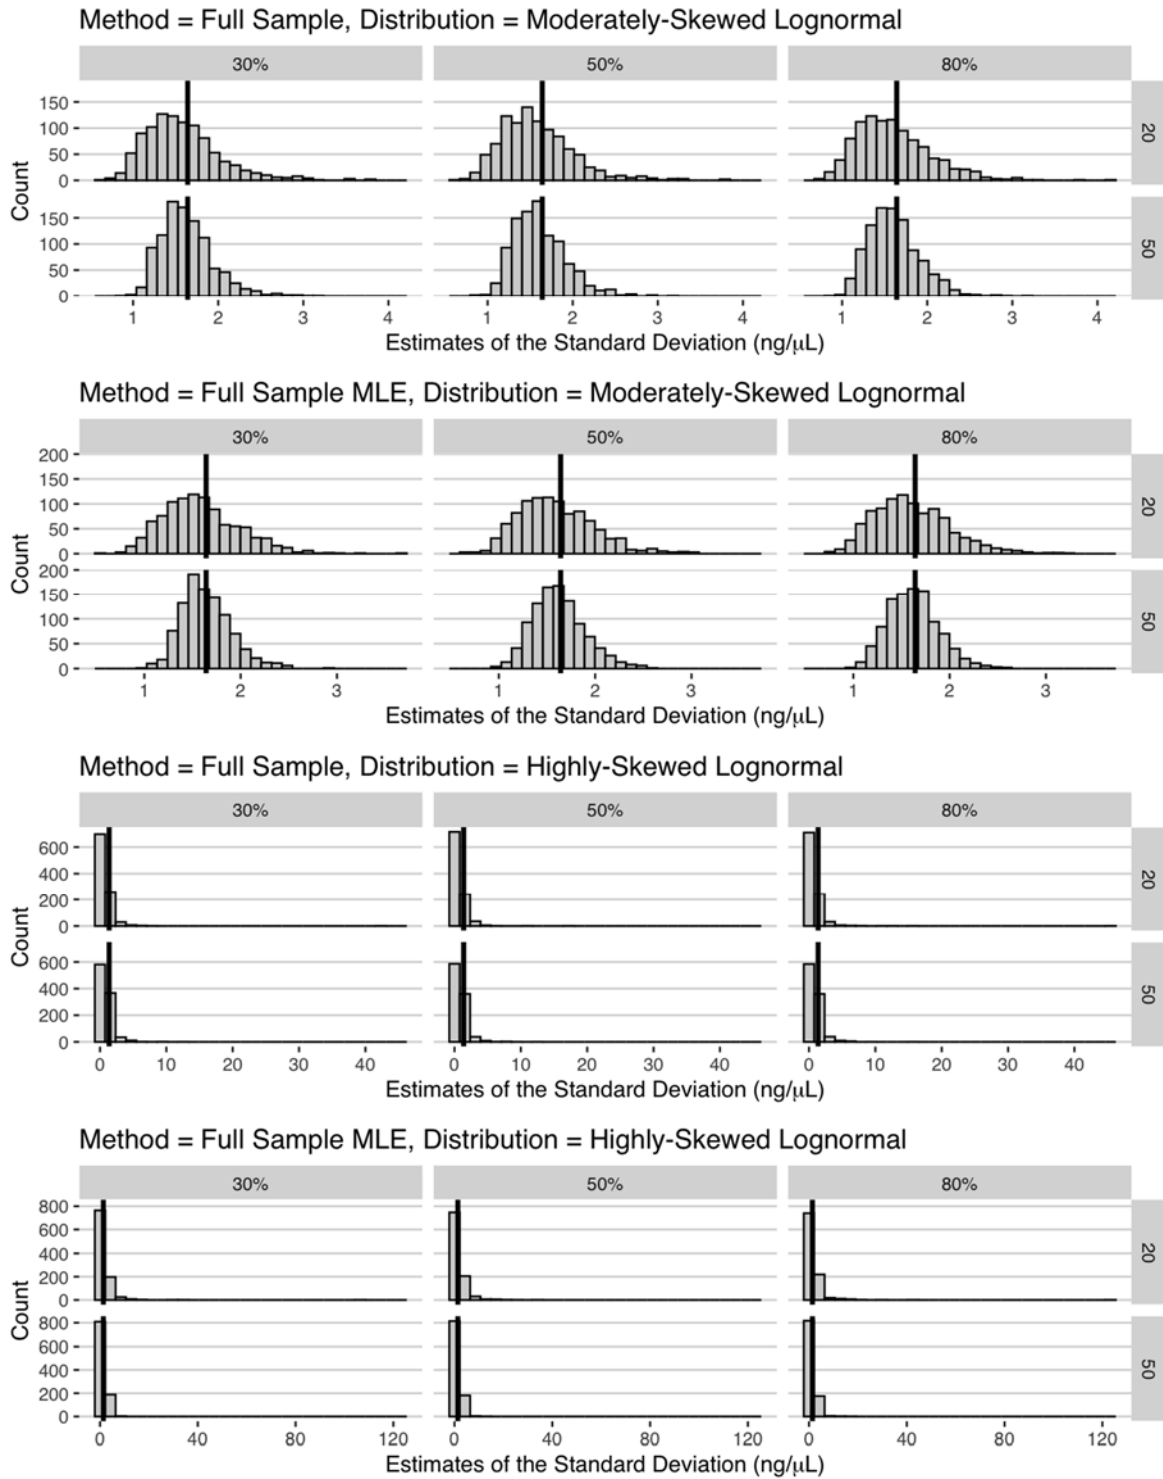

Figure S13. Histograms of simulation study results for full-sample and full sample maximum likelihood standard deviations for the moderately and highly skewed lognormal distributions, for censoring levels of 30%, 50%, and 80%, and for sample sizes 20 and 50.



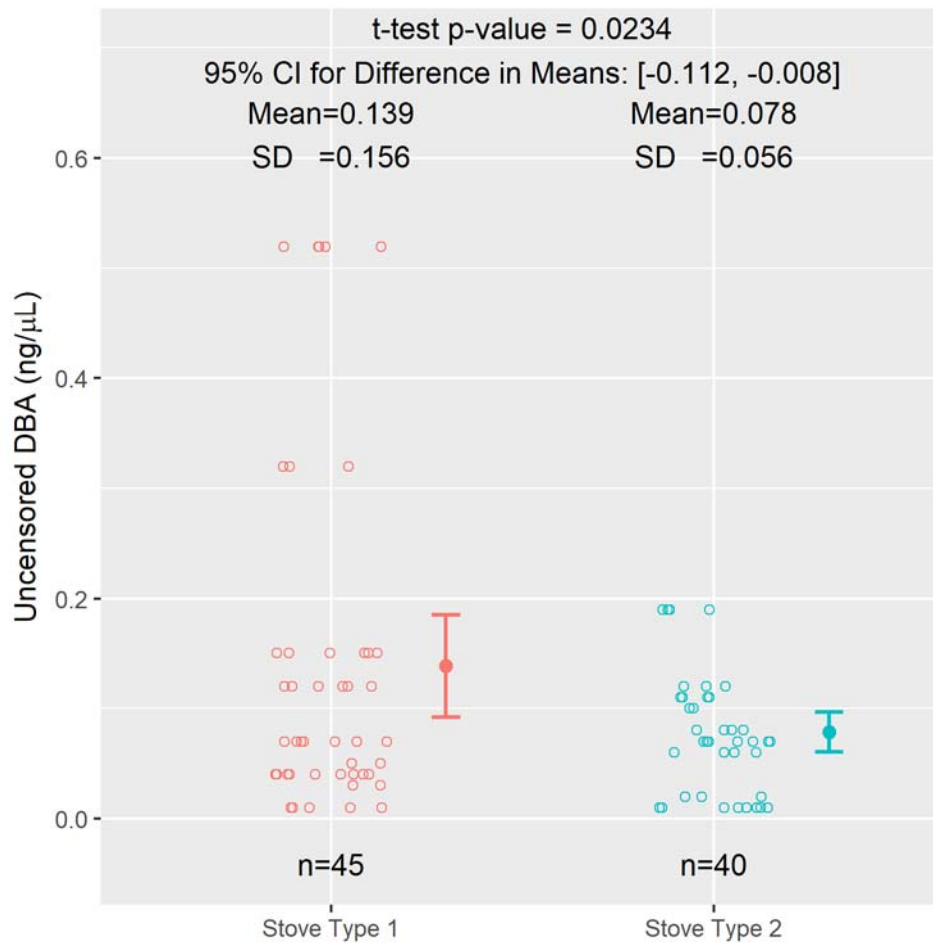

Figure S14. Scatter plots of uncensored resampled dibenzo[a,h]anthracene (DBA) values (ng/μL); also shown are the mean, 95% confidence interval for the mean, and standard deviation (SD) for each stove type and the *p*-value for difference of means t-test.

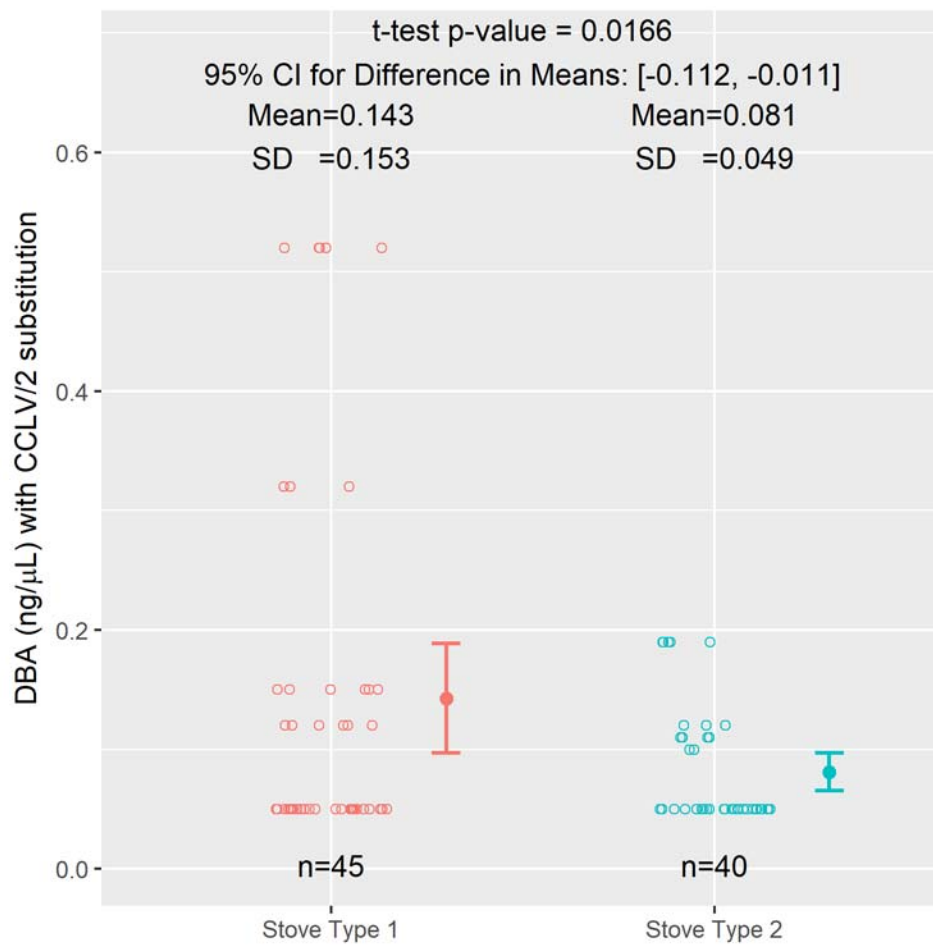

Figure S15. Scatter plots of resampled dibenzo[a,h]anthracene values (ng/ $\mu$ L) after censoring at the CCLV and substituting CCLV/2; also shown are the mean, 95% confidence interval for the mean, and standard deviation (SD) for each stove type and the  $p$ -value for difference of means t-test.
